1 **Species composition and environmental adaptation of indigenous**

2 **Chinese cattle**

3 Yahui Gao<sup>1</sup>, Mathieu Gautier<sup>2,3</sup>, Xiangdong Ding<sup>1</sup>, Hao Zhang<sup>1</sup>, Yachun Wang<sup>1</sup>, Xi

4 Wang<sup>4</sup>, MD Omar Faruque<sup>5</sup>, Junya Li<sup>6</sup>, Shaohui Ye<sup>7</sup>, Xiao Gou<sup>7</sup>, Jianlin Han<sup>8,9</sup>,

5 Johannes A. Lenstra<sup>10</sup>, Yi Zhang<sup>1\*</sup>

6

7 <sup>1</sup> National Engineering Laboratory for Animal Breeding, Key Laboratory of Animal Genetics and  
8 Breeding and Reproduction of MOA, College of Animal Science and Technology, China  
9 Agricultural University, Beijing 100193, China.

10 <sup>2</sup> INRA, UMR CBGP (INRA-IRD-Cirad-Montpellier SupAgro), Campus international de  
11 Baillarguet, Montferrier-sur-Lez, France.

12 <sup>3</sup> Institut de Biologie Computationnelle, 95 rue de la Galera, 34095 Montpellier, France.

13 <sup>4</sup> Institute of Animal Science and Veterinary Medicine, Shanxi Academy of Agricultural Science,  
14 Taiyuan 030032, China.

15 <sup>5</sup> Department of Animal Breeding and Genetics, Bangladesh Agricultural University,  
16 Mymensingh-2202, Bangladesh.

17 <sup>6</sup> Institute of Animal Science, Chinese Academy of Agricultural Sciences, Beijing 100193, China.

18 <sup>7</sup> College of Animal Science and Technology, Yunnan Agricultural University, Kunming 650201,  
19 China.

20 <sup>8</sup> CAAS-ILRI Joint Laboratory on Livestock and Forage Genetic Resources, Institute of Animal  
21 Science, Chinese Academy of Agricultural Sciences (CAAS), Beijing 100193, China.

22 <sup>9</sup> ILRI International Livestock Research Institute (ILRI). P.O. Box 30709, Nairobi 00100, Kenya.

23 <sup>10</sup> Faculty of Veterinary Medicine, Utrecht University, Yalelaan 104, 3584 CM Utrecht, The  
24 Netherlands.

25

26 \*Corresponding author

27 Email: yizhang@cau.edu.cn

28

29 **Abstract**

30       Indigenous Chinese cattle combine taurine and indicine origins and occupy a broad range of  
31 different environments. By 50K SNP genotyping we found a discontinuous distribution of taurine  
32 and indicine cattle ancestries with extremes of less than 10% indicine cattle in the north and more  
33 than 90% in the far south and southwest China. Model-based clustering and  $f_4$ -statistics indicate  
34 introgression of both banteng and gayal into southern Chinese cattle while the sporadic yak  
35 influence in cattle in or near Tibetan area validate earlier findings of mitochondrial DNA analysis.  
36 Geographic patterns of taurine and indicine mitochondrial and Y-chromosomal DNA diversity  
37 largely agree with the autosomal cline. The geographic distribution of the genomic admixture of  
38 different bovine species is proposed to be the combined effect of prehistoric immigrations, gene  
39 flow, major rivers acting as genetic barriers, local breeding objectives and environmental  
40 adaptation. Whole-genome scan for genetic differentiation and association analyses with both  
41 environmental and morphological covariables are remarkably consistent with previous studies and  
42 identify a number of genes implicated in adaptation, which include *TNFRSF19*, *RFX4*, *SP4* and  
43 several coat color genes. We propose indigenous Chinese cattle as a unique and informative  
44 resource for gene-level studies of climate adaptation in mammals.

45

## 46 **Introduction**

47 China harbors around 10 million of indigenous cattle<sup>1</sup>. It is commonly referred as yellow  
48 cattle and divided into 53 indigenous breeds raised in various agro-ecological environments<sup>2,3</sup>.  
49 Their diversity and unique species composition emerged from a complex history. Domestic cattle  
50 spread to East Asia by at least two routes. Taurine cattle migrated from north Eurasia to northern  
51 China and northeast Asia between 5000 and 4000 BP<sup>4</sup>. This is supported by the evidence that  
52 ancient cattle from northern China, dated 4500 to 2300 BP, carried only taurine mtDNA  
53 haplotypes<sup>5</sup>. A unique mtDNA haplotype, T4, observed in East Asian cattle breeds<sup>6-9</sup> is a subtype  
54 of the common haplogroup T3<sup>10</sup>, suggesting a founder effect in Chinese taurine cattle<sup>11</sup>.

55 Indicine cattle (zebu) migrated eastward from their domestication center in the Indus valley  
56 and entered China from the south since 3000 BP<sup>4,12</sup>. Southeast Asian and southern Chinese cattle  
57 are morphologically and genetically recognized as zebu<sup>13,14</sup>. Yue *et al.* provided evidence for an  
58 additional southwestern immigration route of zebu from India into northwest China<sup>15</sup>.

59 The taurine and indicine cattle migrations resulted in a morphological gradient from  
60 humpless taurine cattle in the north to humped indicine cattle in southern and southwestern China<sup>3</sup>.  
61 This has been confirmed by genetic studies using mtDNA<sup>7,8,16,17</sup> and Y-linked markers<sup>18</sup>. A  
62 genetic diversity study using microsatellite markers clustered Chinese indigenous cattle breeds  
63 into one taurine and four indicine groups<sup>19</sup>.

64 In addition to taurine and indicine cattle, several other bovine species have been living in  
65 southern China and Southeast Asia, including banteng, gaur or gayal, which may have been the  
66 dominant cattle species until 4500 BP<sup>4,12</sup>. Gayal in Yunnan province of China carried indicine or  
67 taurine mtDNA but gaur Y chromosome, indicating its hybrid origin<sup>20</sup>. Meanwhile, in Tibetan  
68 Autonomous Region (TAR) of China, bidirectional introgression between yak and cattle has also  
69 been reported<sup>21-24</sup>. Genetic admixture has been identified between zebu and Bali cattle (domestic  
70 banteng) in Indonesia<sup>22,25</sup>. A previous study on hair color and blood protein polymorphism  
71 provided evidence of banteng introgression into Hainan cattle in southeastern China<sup>26</sup>, which was  
72 confirmed by genomic SNP array data<sup>25</sup>.

73 Genomic SNP array has become a powerful tool for population genomics studies in animals.  
74 A recent genomic variation study by Decker *et al.* revealed a worldwide pattern of genetic  
75 admixture in domestic cattle<sup>25</sup>. Other studies focused on Creole<sup>27</sup>, American<sup>28</sup>, East African zebu<sup>29</sup>  
76 and Korean cattle<sup>30</sup>. These advanced approaches also allow the genomic localization of genes  
77 involved in the adaptation to natural or artificial selective constraints<sup>27,31-33</sup>. In the current study,  
78 we generated 50K SNP genotypes to infer the fine-scale characterization of unique species  
79 composition of highly diverse Chinese cattle. In addition, we performed a whole genome-scan for  
80 adaptive differentiation and association analyses with environmental and morphological  
81 population-specific covariables to detect genes that responded to adaptive constraints.

82

## 83 **Results**

84 **Genomic variation.** Observed heterozygosity (Table 1) ranged from 0.145 to 0.327 in  
85 Chinese cattle populations (Fig. 1). Mongolian cattle (MG, NM) and Hazak cattle had the highest  
86 values but southern and southwestern Chinese cattle populations were the lowest. This is most  
87 likely explained by the ascertainment bias, by which the heterozygosity of indicine cattle is  
88 underestimated. Indeed, the observed heterozygosity correlates negatively ( $r^2=0.96$ ) with the zebu  
89 ancestry. A similar trend has previously been observed in West-African cattle<sup>34</sup>. Bali cattle (0.026),  
90 gayal (0.059) and yak (0.029) also have relatively low levels of heterozygosity as normally  
91 observed with SNP panels designed for a different species<sup>35</sup>.

92

93 **Population structure.** Five methods were implemented in this part to explore the population  
94 structure.

95 *PCA.* Figure 2a shows a scatter plot of the first two principal components (PCs), allowing to  
96 assess the structuring of genetic diversity across all the 45 sampled populations, including  
97 outgroup species (Bali cattle, yak, gaur and gayal). The first PC accounting for 17.1% of total  
98 variation separates taurine and indicine cattle as well as other bovine species. The predominant

99 taurine breeds from northern China and TAR cluster with European breeds while populations from  
100 southeastern and far-southwestern China are closer to Indian zebu. The second component  
101 accounting for 3.1% of all variation displays the contrast of Chinese cattle to other bovine species  
102 (Bali, gayal and yak) and also differentiates European cattle breeds. The intermediate positions of  
103 LZ, MAD, BRE, Bali and gayal populations indicate gene flow between species.

104 In an analysis of only Asian cattle (Fig. 2b), the first PC that explains 14.5% of the genetic  
105 variation again corresponds to the taurine-indicine separation, but the second PC that explains  
106 1.45% of the genetic variation represents a gradient from India via Southeast Asia to Southeastern  
107 China.

108

109 *Model-based clustering.* Figure 3a shows an unsupervised hierarchical clustering performed on  
110 the whole data set (i.e., including outgroup species) with different values of K, the number of  
111 clusters. K=2 reproduces the first PCA coordinate with taurine and indicine clusters and a taurine-  
112 indicine gradient from north to south. Higher values of K differentiate European from Asian  
113 taurine breeds (K=3), zebu from other bovine species (K=4), and southern Chinese from Asian  
114 indicine cattle (K=5). Increasing K further generates separate clusters for European cattle breeds  
115 whereas Chinese cattle populations tend to show admixed ancestries. The cross-validation error  
116 gave the lowest value at K = 17 (Supplementary Fig. S1), which differentiates Bali cattle, gayal,  
117 yak, the European taurine breeds and indicine cattle from India/Pakistan, Southeast Asia and  
118 southeastern China, respectively.

119 Figure 3b shows a supervised clustering with prior population information for taurine breeds  
120 (SH, HOL, BSW, SIM), indicine breeds (GIR, SAHW) and other bovine species. In this analysis,  
121 Bali cattle represents the banteng and the domestic gayal replaces the wild gaur since the latter  
122 was too inbred for this analysis. This analysis reproduces the zebu-banteng hybridization in  
123 Indonesia<sup>36</sup> and yak introgression into Tibetan cattle, but also suggests minor banteng and gayal  
124 and southeastern China (Supplementary Fig. S2). Supplementary Figure S3 shows the geographic  
125 distribution of the inferred species components.

126

127 *NeighborNet network.* In a NeighborNet graph constructed from the matrix of Reynolds'  
128 distances between populations using Splitstree (Fig. 4), European and Indian cattle are at the  
129 extreme ends of the network, which is entirely in agreement with both the first PCA coordinate  
130 and the K=2 clustering. Figure 4 also reproduces the intermediate positions of the predominantly  
131 taurine-indicine breeds from TAR or central China and also of the predominantly indicine breeds  
132 from central or southwestern China. In addition, the network confirms the affinity of Indonesian  
133 and southeastern Asian continental breeds with Bali cattle and gayal.

134

135 *Population mixture.* The taurine-indicine mixed composition of Chinese cattle was confirmed by  
136 the sensitive  $f_4$  ratio test (Supplementary Table S1). The estimated taurine ancestry ranges from  
137 close to 0.0 in southeastern China to close to 1.0 in north, with intermediate values ranging from  
138 0.282 to 0.760, from 0.240 to 0.320 and from 0.656 to 0.770 in central China, southwestern China  
139 and TAR, respectively. This pattern was highly correlated with the average memberships  
140 estimated by model-based clustering ( $r=998$ , Supplementary Table S1).

141 As shown in Fig. 5a, negative values of the four-population  $f_4$ -statistics (GIR, X; BAL, YAK)  
142 suggests gene flow from Bali to indicine populations in southeastern China and Southeast Asia.  
143 This gene flow has clearly been more consequential for the Indonesian cattle breeds, MAD, BRE  
144 and PES as well as the southern Chinese breeds LP, HN, WN and WL. For the Indonesian breeds  
145 this confirms previous results of Mohamad *et al.*<sup>36</sup> and Decker *et al.*<sup>25</sup>. Although Bali cattle are  
146 relatively closely related to gaur, replacing Bali cattle by gaur as source of admixture generates  
147 only a moderately negative value for the Indonesian breeds (Fig. 5b). This is even observed for  
148 Bali cattle as a test breed and may reflect the inbreeding of the gaur samples. However, the same  
149 plot shows relatively low (*i.e.*, negative, indicating gene flow) values for the southern Chinese  
150 breeds. In combination with the supervised model-based clustering (Fig. 3b), this may suggest that  
151 these breeds have been introgressed by gaur and/or gayal in addition to banteng, the wild ancestor  
152 of Bali cattle.

153 A  $f_4(\text{SH},\text{X};\text{GAY},\text{YAK})$  plot (Supplementary Fig. S4A) generated negative values for the  
154 indicine GIR, SAHW and BD as test breeds. Since this is not observed with the wild gaur instead  
155 of the domestic gayal (Supplementary Fig. S4B), this indicates indicine introgression into the  
156 domestic gayal population. This is confirmed by two other observations:

- 157 • The statistic  $f_4(\text{GAU},\text{GAY};\text{X},\text{YAK})$  is negative for all test breeds, but clearly more negative  
158 for indicine than for taurine breeds (Supplementary Fig. S4C).
- 159 •  $f_4(\text{GIR},\text{BAL};\text{GAY},\text{YAK})$  is positive but  $f_4(\text{GIR},\text{BAL};\text{GAU},\text{YAK})$  is not (Supplementary Fig.  
160 S4D; Fig. 5B). The same patterns are also observed if GIR is replaced by SH (Supplementary  
161 Fig. S4A, B), which is phylogenetically close to the indicine GIR. Apparently the allele  
162 sharing of GAY with GIR or SH outweighs the allele sharing expected because of the  
163 phylogenetic relationship of gayal and Bali cattle, which most likely is an effect of the  
164 ascertainment bias of the SNP panel towards taurine breeds<sup>37</sup>.

165

166 *Uniparental markers.* Supplementary Table S2 and Figure S5 show mtDNA and Y-chromosomal  
167 haplotype distributions of Chinese cattle breeds, based on our data supplemented by literature data  
168 (Supplementary Table S3). These uniparental markers show a north-to-south taurine-indicine  
169 gradient that resembles closely the autosomal cline (Fig. 6). Haplotype diversity (Supplementary  
170 Table S2 and Fig. S5C) shows that the diversity of taurine mtDNA hardly decreased from north to  
171 south, while indicine mtDNA clearly decreases from southeastern and southwestern China to  
172 northern China.

173

174 **Detection of genomic regions subjected to adaptive constraints.** For a genome-wide  
175 scan for adaptive differentiation, the XtX differentiation statistics was estimated for each SNP  
176 under the so-called core model and visualized in a Manhattan plot (Fig. 7). Among 84 significant  
177 SNPs, SNP Hapmap28985-BTA-73836 on BTA5 was the most significant.

178 The three synthetic environmental covariables are associated with 185 significant SNPs

179 (Supplementary Table S4), from which SNP Hapmap44345-BTA-119580 on BTA11 was the most  
180 significant (Fig. 7). From 30 SNPs associated with morphological covariables (Supplementary  
181 Table S4), SNP ARS-BFGL-NGS-67505 on BTA25 was most significant (Fig. 7).

182 As a matter of expedience, we applied a sliding window approach to identify the main  
183 genomic regions of interest as described in Gautier<sup>38</sup>. Briefly, the UMD3.1 bovine genome  
184 assembly<sup>39</sup> on which all the SNPs were mapped was first split into 4718 consecutive 1-Mb  
185 windows (with a 500-kb overlap). For each window, we counted the number  $n_s$  of SNPs that were  
186 either significantly differentiated at the 0.1% threshold (i.e., with  $XtX > 32.3$ ) or associated  
187 ( $BF > 15$ ) with at least one of the four population-specific covariables. Windows with  $n_s \geq 2$  were  
188 deemed significant and overlapping windows were further merged. This yielded 27 significant  
189 regions detailed in Table 2, of which eight showed significantly differentiated SNPs; 22, 0 and 4  
190 displayed SNPs associated with the first, the second and the third environmental co-variable,  
191 respectively; and 4 displayed SNPs associated with the morphological covariable. Note that only 3  
192 regions (out of the 8) containing significantly differentiated SNPs did not contain any SNPs  
193 associated with the population-specific covariables studied. Finally, a total of 28 candidate genes  
194 were annotated in the significant regions using UCSC (<https://genome.ucsc.edu/>) (Table 2).

195

## 196 Discussion

197 We have investigated the species composition and genomic, mitochondrial as well as Y-  
198 chromosomal variation in Chinese cattle populations. A clear north-south gradient of taurine and  
199 indicine cattle ancestries combined with banteng, gayal and yak introgressions into southern and  
200 southwestern Chinese cattle populations defines the pattern of admixture among Chinese  
201 indigenous cattle, which are supposed to underlie local breeding objectives and adaptation to  
202 different agro-ecological environments. Genome scan for adaptive differentiation and association  
203 with population-specific covariable identify regions and candidate genes relevant for  
204 environmental adaption and morphological differentiation in Chinese cattle.

205 Previous genetic diversity studies using mtDNA and Y-linked markers have characterized a



206 north-south gradient of taurine and indicine admixture in Chinese cattle, which is consistent with  
207 the transition from humpless to humped morphology<sup>7,8,16-18</sup>. A microsatellite study differentiated  
208 five groups of Chinese indigenous cattle breeds<sup>19</sup>.

209 Our PCA (Fig. 2) and model-based clustering (Fig. 3, Supplementary Fig. S3) patterns as well  
210 as the NeighborNet graph (Fig. 4) reveal a clear transition from taurine cattle in the north to zebu  
211 in the south with consistent admixture levels within the breeds and a clear demarcation of five  
212 groups:

- 213 • Cattle from Manchuria, Inner Mongolia and northwestern China with 4 to 8% indicine  
214 admixture. This group corresponds to the taurine type 1<sup>19</sup> (this type also comprises Tibetan  
215 cattle) and to Group 9B in the Felius classification<sup>40</sup>.
- 216 • Taurindicine cattle in TAR and northern China above the Yellow or Wei River with 28 to 35%  
217 indicine admixture, denoted as zebu type 2<sup>19</sup> and belonging to the Huanghuai group of central  
218 Chinese cattle (Group 10A)<sup>40</sup>.
- 219 • Taurindicine cattle below the Yellow River with 61 to 73% indicine genome, corresponding  
220 to indicine types 1 and 4<sup>19</sup>. The northernmost LX, JX and NY breeds belong to the Huanghai  
221 group (Group 10A)<sup>40</sup>, but the other breeds to the Changzu group (Group 10B)<sup>40</sup>.
- 222 • Predominant indicine cattle in southern China with an indicine genomic component of 79 to  
223 87% (zebu type 3<sup>19</sup>, Group 10B<sup>40</sup>).
- 224 • Indicine cattle with a >90% indicine genome (also indicine type 3<sup>19</sup>, Group 10B<sup>40</sup>).

225 Cattle from Northeast Asia and northern China have typical taurine morphological features.  
226 Its genetic distinctiveness and old origin evolved from the unique mtDNA haplogroup T4 found in  
227 modern breeds from Japan, Korea, Mongolia<sup>6,41</sup>, Siberia (Yakut cattle)<sup>9</sup>, northern China<sup>7,8</sup>  
228 (Supplementary Fig. S5A) and in ancient cattle in northern China from 2300-4500 BP<sup>5</sup>. In  
229 addition, Decker *et al.* found a separate position of Japanese and Korean cattle<sup>25</sup>. In this study, we  
230 found that northern Chinese, South Korean and Japanese cattle share genetic ancestry with the  
231 Siberian Yakut and the indigenous northeastern China close to Korea. These breeds represent the

232 eastern range of Turano-Mongolian cattle, which have retained their original dark-brown coat  
233 color pattern in Mongolian and Korean cattle.

234 The admixture pattern, however, suggests European cattle influence to northern Chinese cattle  
235 diversity. Possibly migrations of nomads in the steppes of Central Asia and Mongolia, which in  
236 the Middle Ages led to the establishment of the Mongolian empire, facilitated eastward as well as  
237 westward gene flow across Eurasia. Additionally, in the past few decades programs have been  
238 implemented in China to upgrade productivity by crossing local breeds with European breeds<sup>3,12</sup>.  
239 Influence of European cattle was captured by model-based clustering analysis, e.g. Brown Swiss  
240 and Simmental in Kazak, Holstein in LS, and Limousine in LX, JN and WL (Fig. 3).

241 From north to south, levels of taurine autosomal, mitochondrial and Y-chromosomal DNA  
242 decrease, but are still appreciable in southwestern China (Supplementary Figs S3 and S5). The  
243 occurrence of indicine mtDNA in mixed taurine-indicine cattle is a unique feature of Chinese  
244 breeds<sup>11</sup>. The high taurine mtDNA diversity in southern China (Supplementary Fig. S5C) indicates  
245 an absence of a major founder effect. This is more compatible with immigration before the arrival  
246 of indicine cattle around 3000 BP than with a later introgression into an existing indicine  
247 population. The immigration of zebu from the present Myanmar and Indochina to the north with  
248 a plausible contribution of an eastward gene flow in western China<sup>15</sup> resulted in significant  
249 indicine components in northern Chinese and Mongolian cattle (Supplementary Figs S3 and S5).  
250 The pattern of indicine mtDNA diversity (Supplementary Fig. S5C) suggests a population  
251 bottleneck when they crossed the Pearl River in southeastern China.

252 Y-chromosomal and autosomal indicine components correlate well (Fig. 6). Exceptions are  
253 the Guanlin (GL) and Nanyang (NY) breeds with relatively low indicine Y-chromosomal  
254 frequencies. Remarkably, the indicine autosomal component has a discontinuous distribution (Figs  
255 2-4; Supplementary Fig. S3) with the largest gap across the Yellow River separating JN (29%  
256 zebu) from ES (61%) and NY (64%). This river might be a physical barrier of gene flow, but this  
257 cannot explain the absence in our panel of cattle with an indicine component between 35% and  
258 61%. It might be hypothesized that in cattle with equal taurine and indicine components,  
259 outbreeding depression outweighs heterosis, for instance by incompatibility of genes from

260 different origins conferring fitness<sup>42</sup>. It is again remarkable that cattle at both sides of the river are  
261 categorized as belonging to the Huanghuai group and resemble western Asian and African cattle  
262 because of their similar cervico-thoracic hump<sup>2</sup>.

263 The NeighborNet shows that indicine cattle from far southwestern China (DH, BN), which are  
264 found in the west of the Mekong River, are more closely related to Thai cattle than to southeastern  
265 Chinese cattle. This is also supported by the PCA and admixture patterns (Figs 2 and 3). The  
266 separate position of Thai cattle confirms the results of Wangkunmhang *et al.*<sup>14</sup>. The Mekong River  
267 acted also as a genetic barrier for swamp buffalo<sup>43</sup>.

268 Another potential source of diversity in southern Chinese cattle are the introgressions from  
269 other bovine species living in China and Southeast Asia, including yak, gayal and its wild ancestor  
270 gaur, and banteng, represented by its domestic relative Bali cattle. (Fig. 3; Supplementary Fig. S2).  
271 There are several examples of hybridization of different bovine species. Yak mtDNA has been  
272 detected in indigenous cattle distributed on the Qinghai-Tibetan plateau and in Diqing cattle (DQ)  
273 of Yunnan province<sup>21,23</sup>. We did not detect yak mtDNA in our cattle panel, but we detected  
274 influence of yak in the Tibetan LZ population based on the model-based clustering analysis.

275 A study of blood protein polymorphism<sup>26</sup> suggested banteng ancestry in Hainan cattle. Using  
276 mtDNA and microsatellite genotyping, Mohamad *et al.*<sup>44</sup> characterized banteng admixture in  
277 Indonesian zebu breeds. This was confirmed by 50K SNP analysis<sup>25</sup>, which also detected a low  
278 level of banteng introgression in southern Chinese breeds. However, analyzing Chinese cattle  
279 together with both banteng (represented by its domestic derivative Bali cattle) and gaur (the wild  
280 ancestor of gayal) with model based clustering (Fig. 3) and *f4*-statistics (Fig. 5) provided  
281 consistent evidence of both gayal and banteng introgression into WL, WN and HN breeds from  
282 southeastern China and also into Thai zebu at a relatively low proportion.

283 Conversely, similar *f4*-statistics (Supplementary Fig. S4) suggested introgression of zebu into  
284 gayal, which has been confirmed in the gayal population from Yunnan carrying both indicine and  
285 taurine mitochondrial genomes<sup>20</sup>. Similarly, cattle introgression has been detected in yak  
286 populations<sup>24</sup>.

287 The genetic variation described above reflects the combined effect of prehistoric  
288 immigrations of taurine and indicine cattle, subsequent gene flow between populations, local  
289 selection objectives and environmental adaptation. Indigenous Chinese cattle with indicine-taurine  
290 ratios varying between zero and one and subject to a broad range of climates is a valuable resource  
291 to identify potential genomic regions and functional genes underlying the environmental adaption.  
292 By combining signals of population differentiation (XtX) and association with three synthetic  
293 environmental covariables and one synthetic morphological covariable (Supplementary Fig. S6),  
294 we identified 27 genomic regions and 28 candidate genes targeted by natural or artificial selection  
295 (Table 2).

296 Interestingly, 12 out of the 27 regions overlap with core selective sweep (CSS) regions<sup>45</sup>,  
297 while 20 and 23 regions overlap with breed-wise and breed group-wise hotspots of selective  
298 sweeps, respectively<sup>46</sup> (Supplementary Table S5). However, we report for the first time the region  
299 BTA12: 34.0-35.5 Mb, which harbors *TNFRSF19*. This member of the TNF-receptor  
300 superfamily<sup>47</sup> is highly expressed during embryonic development<sup>48</sup>.

301 In other studies, strong signals of selection in tropical cattle have been detected on  
302 BTA5<sup>32,34,49,50</sup>. Notably, Porto-Neto *et al.* identified a 20 Mb region on BTA5 with effects on  
303 parasite resistance, yearling weight, body condition score, coat color and penile sheath score<sup>32</sup>. We  
304 found a significant signature of selection for XtX and the environmental PC1 and PC3 as well as  
305 the morphological PC1 in the region 69.5-71.0 on BTA5 region 69.5-71.0 (Table 2), which  
306 contains the candidate gene *RFX4*. This gene is a member of Regulatory Factor X (RFX) family of  
307 transcriptional regulators that influence MHC class II expression<sup>51</sup> and play a critical role in brain  
308 development<sup>19,52</sup>. It was also found to affect heifer fertility in tropical composition breed  
309 Brangus<sup>53</sup>.

310 Coat color is an important target of selection in many domestic animals. The common  
311 denotation of yellow cattle for the indigenous Chinese cattle refers to its predominant light to dark  
312 brown color. In current study, selection signatures were identified near several known color genes,  
313 including *KITLG* (near SNP BTA-74300-no-rs on BTA5)<sup>38,54</sup>, and *LEFI*<sup>32,55</sup> (here indicated by a  
314 peak in the XtX GWAS on BTA6). These genes and another candidate gene *MCM6* (near ARS-

315 BFGL-NGS-92772 on BTA2, also identified by Hudson *et al*<sup>50</sup>) overlap with pigmentation QTL  
316 regions underlying UV-protection<sup>56</sup>. The environmental PC1 signal near *IGFBP7* and the  
317 combined XtX-morphological signal near *ADRAID* (Table 2) are close to the coat color genes  
318 *KIT*<sup>56,57</sup> and *ATRN*<sup>56,58</sup>, respectively.

319 We further detected an environmental PC1 association signal near *SP4* (Sp4 transcription  
320 factor) as novel candidate gene on BTA4. It is a member of the Sp1-family of zinc finger  
321 transcription factors and is required for normal murine growth, viability, and male fertility<sup>59</sup>. In  
322 cattle, *SP4* was suggested to have effect on body size and testicular growth from birth to yearling  
323 age<sup>60</sup>.

324 It is interesting to note that Chinese and African cattle have developed independently a  
325 variable taurine-indicine ancestry following a gradient from tropical to temperate climates. An  
326 attractive opportunity is a detailed comparison of gene variants involved in climate adaptation by  
327 using whole genome sequence data<sup>61</sup>. It may be anticipated that in both regions adaptation to agro-  
328 ecological constraints is mediated by recruiting and combining gene variants from taurine and  
329 indicine origins with possible original contributions in Chinese indigenous cattle from the indicine  
330 mtDNA, and the minor gayal, and banteng and yak genomic ancestry.

331

## 332 **Methods**

333 **Ethics statement.** The protocols for collection of the blood and hair samples of experimental  
334 individuals were reviewed and approved by the Institutional Animal Care and Use Committee  
335 (IACUC) at China Agricultural University. And all experiments were performed in accordance  
336 with approved relevant guidelines and regulations.

337

338 **Samples collection and genotyping.** We collected samples of 437 animals from 24 breeds  
339 (Table 1), twenty of which are indigenous cattle populations from northeastern China, central  
340 China, southeastern China, southwestern China, far southwestern China and or TAR (Fig. 1). We

341 also examined Bangladeshi cattle and German Simmental, and two related bovine species, the  
342 gayal and yak. Samples were genotyped with Illumina BovineSNP50 BeadChip using standard  
343 procedures<sup>62</sup>. Genotypes are accessible via the WIDDE repository  
344 (<http://widde.toulouse.inra.fr/widde/>).

345 We compared these newly generated data with published genotypes of some European and  
346 Asian cattle breeds, Bali cattle and gaur (Table 1). The combined data set comprises 37,429 SNPs.  
347 Using PLINK<sup>63</sup>, we removed SNPs with call rates <90% or with minor allele frequencies <0.001  
348 and discarded individuals with 10% missing genotypes. The resulting data set contained 36,872  
349 SNPs and 736 animals from 44 populations representing taurine cattle, zebu, and three species  
350 related to cattle (*Bos javanicus* - banteng, *Bos gruniens* - yak and, *Bos frontalis* - gayal). Gaur  
351 (*Bos gaurus*)<sup>64</sup> was used instead of gayal in *f<sub>4</sub>* analysis (see below) of the species composition of  
352 Chinese cattle because of the indicine zebu introgression into gayal.

353

354 **Population genetic analysis.** We used PLINK<sup>63</sup> to calculate the observed homozygosity for  
355 each population. Three complementary methods were used to analyze the genetic diversity among  
356 populations. First, a Principal Component Analysis (PCA) was carried out to investigate the  
357 pattern of genetic differentiation among populations and individuals using the R package  
358 SNPRelate<sup>65</sup>, which performs eigen-decomposition of the genetic covariance matrix to compute  
359 the eigenvalues and eigenvectors. Second, population structure was evaluated by unsupervised and  
360 supervised model-based hierarchical clustering implemented in the Admixture software<sup>66</sup>. The  
361 results were visualized using the program Distruct<sup>67</sup>. Third, a NeighbourNet network was  
362 constructed using Reynold's distances between populations using Splitstree 4.13<sup>68</sup>.

363 To investigate species composition of Chinese cattle, we used the four-population test (*f<sub>4</sub>*-  
364 statistics) implemented in ADMIXTOOLS<sup>69</sup>. Additionally, taurine and indicine ancestries in  
365 Chinese cattle populations were quantified via the *f<sub>4</sub>* ratio estimation in ADMIXTOOLS, which  
366 allows inference of the admixture proportions without access to accurate surrogates for the  
367 ancestral populations<sup>69</sup>. The proportion of taurine ancestry was then computed as

368 
$$\alpha = \frac{f^{4(A,O;X,C)}}{f^{4(A,O;B,C)}}$$

369 in which O is an outgroup (BAL), B a reference taurine cattle (YKT), C an Indian zebu cattle  
370 (GIR), A a population related to B (SH), and X the Chinese target population. Standard errors  
371 were computed with the Block Jackknife procedure in ADMIXTOOLS using default options<sup>69</sup>.

372

373 **Mitochondrial DNA and Y-chromosomal markers.** A 445-bp mtDNA control region  
374 was amplified and sequenced as described previously (GenBank accession codes KY682307-  
375 KY682687)<sup>20</sup>. These sequences were analyzed together with published sequences (Supplementary  
376 Tables S2 and S3). Haplotype diversity of the segment 16,023-16,262 (numbering according to  
377 GenBank accession no. V00654) was computed using the software DnaSP<sup>70</sup>. Y-chromosomal  
378 genotyping was carried out with the protocol described by Bonfiglio *et al.* (2012)<sup>71</sup>, which  
379 differentiates Y1 (dominant in north Europe) and Y2 (dominant in other taurine cattle) and Y3  
380 (indicine cattle) type Y chromosome<sup>72</sup>.

381

382 **Genome-scan for adaptive differentiation and association with environmental**  
383 **and morphological covariables.** Whole genome-scans for adaptive differentiation and  
384 association with population-specific co-variables were performed with BayPass 2.1<sup>38</sup>. The  
385 underlying models explicitly account for the covariance structure among the population allele  
386 frequencies, which make the approach particularly robust to complex demographic histories<sup>38</sup>.  
387 Identification of overly differentiated SNPs was based on the XtX statistics<sup>38,73</sup> estimated under  
388 the core model of BayPass. To calibrate the XtX's, a pseudo-observed data set (POD) containing  
389 250,000 SNPs simulated under the inference model with hyperparameters equal to those estimated  
390 on the real data set was generated and further analyzed under the same conditions following the  
391 procedure described in Gautier<sup>38</sup>. In particular, we ensured that the posterior estimate of the scaled  
392 covariance matrix of population allele frequencies (Omega) obtained with the POD was similar to  
393 that obtained on the real data since the FMD distance between the two matrices was found equal  
394 to 0.28<sup>38</sup>. Similarly, the posterior means of the two hyperparameters a and b for the *Beta*

395 distribution of across population allele frequencies obtained on the POD ( $a=b=1.02$ ) were almost  
396 equal to the ones obtained in the original data ( $a=b=1.00$ ). Taken together, these sanity checks  
397 indicated that the POD faithfully mimics the real data set, allowing us to define a 0.1%  
398 significance threshold on the XtX statistics ( $XtX=32.3$ ) to identify genomic regions harboring  
399 footprints of selection.

400 Genome-wide analysis of association with population specific co-variables was carried out  
401 using the default options of the AUX model parameterized with the scaled covariance matrix  
402 ( $\Omega$ ) obtained on the real data set as described above. This model allows to account explicitly  
403 for multiple testing issue by integrating over (and estimating) the unknown proportion of SNPs  
404 actually associated with a given covariable. The support for association of each SNP with each co-  
405 variable was evaluated by computing Bayes Factor (BF) and a  $BF>15$  is considered as decisive  
406 evidence for association<sup>38</sup>.

407 We collected values for six environmental covariables, i.e. average temperature, average  
408 relative humidity, sunshine, average air pressure, wind speed, and precipitation from China  
409 Meteorological Administration (<http://data.cma.cn/>). Values for 10 morphological covariables, i.e.  
410 male body weight, female body weight, male height, female height, male body length, female  
411 body length, male heart girth, female heart girth, male fore-shank circumference, and female fore-  
412 shank circumference were provided for 17 out of the 20 studied indigenous breeds in National  
413 Commission of Animal Genetics Resources<sup>3</sup>, but these data were not available for the breeds LZ,  
414 BN and HH. We carried out a PCA on scaled variables for environmental and morphological co-  
415 variables separately. The first three environmental PCs and the first morphological PC were  
416 retained as uncorrelated co-variables for association studies (Supplementary Tables S6 and S7).

417

## 418 **References**

- 419 1. Zhang, Y. Calmly thinking on the cognition of the Chinese indigenous yellow cattle breed  
420 resources and sustainable utilization. *China Cattle Science*. **39**, 1-6 (2013). In Chinese.
- 421 2. Chen, Y. C. & Cao, H. H. Diversity of Chinese yellow cattle breeds and their conservation.  
422 *Biodiversity Science*. **9**, 275-283 (2001). In Chinese.



- 423 3. China National Commission of Animal Genetics Resources. *Animal genetic resources in*  
424 *China – Bovine*, (China Agriculture Press, 2011). In Chinese.
- 425 4. Payne, W. J. A. & Hodges, J. *Tropical Cattle, Origins, Breeds and Breeding Policies*,  
426 (Blackwell Science, 1997).
- 427 5. Cai, D. W., *et al.* The origins of Chinese domestic cattle as revealed by ancient DNA analysis.  
428 *J. Archaeol. Sci.* **41**, 423-434 (2014).
- 429 6. Mannen, H., *et al.* Independent mitochondrial origin and historical genetic differentiation in  
430 North Eastern Asian cattle. *Mol. Phylogenet. Evol.* **32**, 539-544 (2004).
- 431 7. Lei, C. Z., *et al.* Origin and phylogeographical structure of Chinese cattle. *Anim. Genet.* **37**,  
432 579-582 (2006).
- 433 8. Lai, S. J., Liu, Y. P., Liu, Y. X., Li, X. W. & Yao, Y. G. Genetic diversity and origin of  
434 Chinese cattle revealed by mtDNA D-loop sequence variation. *Mol. Phylogenet. Evol.* **38**,  
435 146-154 (2006).
- 436 9. Kantanen, J., *et al.* Maternal and paternal genealogy of Eurasian taurine cattle (*Bos taurus*).  
437 *Heredity.* **103**, 404-415 (2009).
- 438 10. Achilli, A., *et al.* Mitochondrial genomes of extinct aurochs survive in domestic cattle. *Curr.*  
439 *Biol.* **18**, R157-158 (2008).
- 440 11. Lenstra, J. A., *et al.* Meta-analysis of mitochondrial DNA reveals several population  
441 bottlenecks during worldwide migrations of cattle. *Diversity.* **6**, 178-187 (2014).
- 442 12. Feliuss, M., Beerling, M. L., Buchanan, D. S., Theunissen, B., Koolmees, P. A. & Lenstra, J. A.  
443 On the history of cattle genetic resources. *Diversity.* **6**, 705-750 (2014).
- 444 13. Chen, S., *et al.* Zebu cattle are an exclusive legacy of the South Asia. *Mol. Biol. Evol.* **27**, 1-6  
445 (2010).
- 446 14. Wangkumhang, P., *et al.* Genetic analysis of Thai cattle reveals a Southeast Asian indicine  
447 ancestry. *PeerJ.* **3**, e1318, 10.7717/peerj.1318 (2015).
- 448 15. Yue, X., *et al.* When and how did *Bos indicus* introgress into Mongolian cattle? *Gene.* **537**,  
449 214-219 (2014).
- 450 16. Cai, X., Chen, H., Lei, C., Wang, S., Xue, K. & Zhang B. MtDNA diversity and genetic  
451 lineages of eighteen cattle breeds from *Bos taurus* and *Bos indicus* in China. *Genetica.* **131**,  
452 175-183 (2007).
- 453 17. Jia, S., *et al.* A new insight into cattle's maternal origin in six Asian countries. *J Genet*  
454 *Genomics.* **37**, 173-180 (2010).
- 455 18. Li, R., *et al.* Paternal origins of Chinese cattle. *Anim. Genet.* **44**, 446-469 (2013).
- 456 19. Zhang, G. X., *et al.* Genetic diversity and population structure of indigenous yellow cattle  
457 breeds of China using 30 microsatellite markers. *Anim. Genet.* **38**, 550-559 (2007).
- 458 20. Gou, X., Wang, Y., Yang, S., Deng, W. & Mao H. Genetic diversity and origin of Gayal and  
459 cattle in Yunnan revealed by mtDNA control region and SRY gene sequence variation. *J.*  
460 *Anim. Breed. Genet.* **127**, 154-160 (2010).
- 461 21. Yu, Y., Nie, L., He, Z. Q., Wen, J. K., Jian, C. S. & Zhang, Y. P. Mitochondrial DNA  
462 variation in cattle of South China: origin and introgression. *Anim. Genet.* **30**, 245-250 (1999).
- 463 22. Kikkawa, Y., *et al.* Phylogenies using mtDNA and SRY provide evidence for male-mediated  
464 introgression in Asian domestic cattle. *Anim. Genet.* **34**, 96-101 (2003).
- 465 23. Shi, J., Qiao, H. S., Hosoi, E. & Ozawa, S. Phylogenetic relationship between the Yellow  
466 cattle in Qinghai province, China, and Japanese Black cattle based on mitochondrial DNA D-  
467 loop sequence polymorphism. *Anim. Sci. J.* **75**, 13-519 (2004). In Japanese.
- 468 24. Qi, X. B., Jianlin, H., Wang, G., Rege, J. E. O. & Hanotte, O. Assessment of cattle genetic  
469 introgression into domestic yak populations using mitochondrial and microsatellite DNA

- 470 markers. *Anim. Genet.* **41**, 242-252 (2009).
- 471 25. Decker, J. E., *et al.* Worldwide patterns of ancestry, divergence, and admixture in  
472 domesticated cattle. *PLoS Genet.* **10**, e1004254 (2014).
- 473 26. Chen, Y., Wang, Y., Cao, H., Pang, Z. & Yang, G. Black-ear gene and blood polymorphism  
474 in four southern Chinese cattle groups. *Anim. Genet.* **25 Suppl 1**, 89-90 (1994).
- 475 27. Gautier, M. & Naves, M. Footprints of selection in the ancestral admixture of a New World  
476 Creole cattle breed. *Mol. Ecol.* **20**, 3128-3143 (2011).
- 477 28. McTavish, E. J., Decker, J. E., Schnabel, R. D., Taylor, J. F. & Hillis, D. M. New World cattle  
478 show ancestry from multiple independent domestication events. *Proc. Natl. Acad. Sci. U.S.A.*  
479 **110**, E1398-1406 (2013).
- 480 29. Mbole-Kariuki, M. N., *et al.* Genome-wide analysis reveals the ancient and recent admixture  
481 history of East African Shorthorn Zebu from Western Kenya. *Heredity.* **113**, 297-305 (2014).
- 482 30. Sharma, A., Lee, S. H., Lim, D., Chai, H. H., Choi, B. H. & Cho, Y. A genome-wide  
483 assessment of genetic diversity and population structure of Korean native cattle breeds. *BMC*  
484 *Genet.* **17**, 139 (2016).
- 485 31. Ramey, H. R., Decker, J. E., McKay, S. D., Rolf, M. M., Schnabel, R. D. & Taylor, J.F.  
486 Detection of selective sweeps in cattle using genome-wide SNP data. *BMC Genomics.* **14**, 382  
487 (2013).
- 488 32. Porto-Neto, L. R., *et al.* The genetic architecture of climatic adaptation of tropical cattle. *PLoS*  
489 *One.* **9**, e113284 (2014).
- 490 33. Flori, L., *et al.* Adaptive admixture in the West African bovine hybrid zone: insight from the  
491 Borgou population. *Mol. Ecol.* **23**, 3241-3257 (2014).
- 492 34. Gautier, M., *et al.* A whole genome Bayesian scan for adaptive genetic divergence in West  
493 African cattle. *BMC Genomics.* **10**, 550 (2009).
- 494 35. Miller, J. M., Kijas, J. W., Heaton, M. P., McEwan, J. C. & Coltman, D. W. Consistent  
495 divergence times and allele sharing measured from cross-species application of SNP chips  
496 developed for three domestic species. *Mol Ecol Resour.* **12**, 1145-1150 (2012).
- 497 36. Mohamad, K., *et al.* The origin of Indonesian cattle and conservation genetics of the Bali  
498 cattle breed. *Reprod. Domest. Anim.* **47 Suppl 1**, 18-20 (2012).
- 499 37. Lipson, M., & Reich, D. A working model of the deep relationships of diverse modern human  
500 genetic lineages outside of Africa. *Mol. Biol. Evol.* **34**, 889-902 (2017).
- 501 38. Gautier, M. Genome-wide scan for adaptive divergence and association with population-  
502 specific covariates. *Genetics.* **201**, 1555-1579 (2015).
- 503 39. Liu, Y., *et al.* *Bos taurus* genome assembly. *BMC Genomics.* **10**, 180 (2009).
- 504 40. Feliuss, M., Koolmees, P. A. & Theunissen, B. On the breeds of cattle-historic and current  
505 classifications. *Diversity.* 2011;3(4):660-92.
- 506 41. Sasazaki, S., Odahara, S., Hiura, C., Mukai, F. & Mannen, H. Mitochondrial DNA variation  
507 and genetic relationships in Japanese and Korean cattle. *Asian-Aust. J. Anim. Sci.* **19**, 1394-  
508 1398 (2006).
- 509 42. Todesco, M., *et al.* Hybridization and extinction. *Evol Appl.* **9**, 892-908 (2016).
- 510 43. Zhang, Y., *et al.* Strong and stable geographic differentiation of swamp buffalo maternal and  
511 paternal lineages indicates domestication in the China/Indochina border region. *Mol. Ecol.* **25**,  
512 1530-1550 (2016).
- 513 44. Mohamad, K., *et al.* On the origin of Indonesian cattle. *PLoS One.* **4**, e5490 (2009).
- 514 45. Gutiérrez-Gil, B., Arranz, J. J. & Wiener, P. An interpretive review of selective sweep studies  
515 in *Bos taurus* cattle populations: identification of unique and shared selection signals across  
516 breeds. *Front Genet.* **6**, 167 (2015).

- 517 46. Randhawa, I. A., Khatkar, M. S., Thomson, P. C. & Raadsma, H. W. A meta-assembly of  
518 selection signatures in cattle. *PLoS One*. **11**, e0153013 (2016).
- 519 47. Hu, S., Tamada, K., Ni, J., Vincenz, C. & Chen, L. Characterization of TNFRSF19, a novel  
520 member of the tumor necrosis factor receptor superfamily. *Genomics*. **62**, 103-107 (1999).
- 521 48. Pispá, J., Mikkola, M. L., Mustonen, T. & Thesleff, I. Ectodysplasin, Edar and TNFRSF19 are  
522 expressed in complementary and overlapping patterns during mouse embryogenesis. *Gene*  
523 *Expr. Patterns*. **3**, 675-679 (2003).
- 524 49. Chan, E. K., Nagaraj, S. H. & Reverter, A. The evolution of tropical adaptation comparing  
525 taurine and zebu cattle. *Anim. Genet*. **41**, 467-477 (2010).
- 526 50. Hudson, N. J., Porto-Neto, L. R., Kijas, J., McWilliam, S., Taft, R. J. & Reverter, A.  
527 Information compression exploits patterns of genome composition to discriminate populations  
528 and highlight regions of evolutionary interest. *BMC Bioinformatics*. **15**, 66 (2014).
- 529 51. Aftab, S., Semenec, L., Chu, J. S. & Chen, N. Identification and characterization of novel  
530 human tissue-specific RFX transcription factors. *BMC Evol. Biol*. **8**, 226 (2008).
- 531 52. Blackshear, P. J., Graves, J. P., Stumpo, D. J., Cobos, I., Rubenstein, J. L. & Zeldin, D. C.  
532 Graded phenotypic response to partial and complete deficiency of a brain-specific transcript  
533 variant of the winged helix transcription factor RFX4. *Development*. **130**, 4539-4552 (2003).
- 534 53. Fortes, M. R., *et al.* Gene network analyses of first service conception in Brangus heifers: use  
535 of genome and trait associations, hypothalamic-transcriptome information, and transcription  
536 factors. *J. Anim. Sci*. **90**, 2894-2906 (2012).
- 537 54. Picardo, M. & Cardinali, G. The genetic determination of skin pigmentation: KITLG and the  
538 KITLG/c-Kit pathway as key players in the onset of human familial pigmentary diseases. *J.*  
539 *Invest. Dermatol*. **131**, 1182-1185 (2011).
- 540 55. Gage, P. J., Qian, M., Wu, D. & Rosenberg, K. I. The canonical Wnt signaling antagonist  
541 DKK2 is an essential effector of PITX2 function during normal eye development. *Dev. Biol*.  
542 **317**, 310-324 (2008).
- 543 56. Pausch, H., *et al.* Identification of QTL for UV-protective eye area pigmentation in cattle by  
544 progeny phenotyping and genome-wide association analysis. *PLoS One*. **7**, e36346 (2012).
- 545 57. Sorbolini, S., *et al.* Use of canonical discriminant analysis to study signatures of selection in  
546 cattle. *Genet. Sel. Evol*. **48**, 58 (2016).
- 547 58. Seo, K., Mohanty, T. R., Choi, T. & Hwang, I. Biology of epidermal and hair pigmentation in  
548 cattle: a mini-review. *Vet. Dermatol*. **18**, 392-400 (2007).
- 549 59. Hagen, G., Müller, S., Beato, M. & Suske, G. Cloning by recognition site screening of two  
550 novel GT box binding proteins: a family of Sp1 related genes. *Nucleic Acids Res*. **20**, 5519-  
551 5525 (1992).
- 552 60. Utsunomiya, Y. T., *et al.* Genome-wide mapping of loci explaining variance in scrotal  
553 circumference in nellore cattle. *PLoS One*. **9**, e88561 (2014).
- 554 61. Kim, J., *et al.* The genome landscape of indigenous African cattle. *Genome Biol*. **18**, 34  
555 (2017).
- 556 62. Matukumalli, L. K., *et al.* Development and characterization of a high density SNP  
557 genotyping assay for cattle. *PLoS One*. **4**, e5350 (2009).
- 558 63. Purcell, S., *et al.* PLINK: a tool set for whole-genome association and population-based  
559 linkage analyses. *Am. J. Hum. Genet*. **81**, 559-575 (2007).
- 560 64. Decker, J. E., *et al.* Resolving the evolution of extant and extinct ruminants with high-  
561 throughput phylogenomics. *Proc. Natl. Acad. Sci. U.S.A*. **106**, 18644-18649 (2009).
- 562 65. Zheng, X., Levine, D., Shen, J., Gogarten, S. M., Laurie, C. & Weir, B. S. A high-  
563 performance computing toolset for relatedness and principal component analysis of SNP data.

- 564            *Bioinformatics*. **28**, 3326-3328 (2012).
- 565    66. Alexander, D. H., Novembre, J. & Lange, K. Fast model-based estimation of ancestry in  
566            unrelated individuals. *Genome Res.* **19**, 1655-1664 (2009).
- 567    67. Rosenberg, N. A. DISTRUCT: a program for the graphical display of population structure.  
568            *Mol. Ecol. Notes.* **4**, 137-138 (2004).
- 569    68. Huson, D. H. & Bryant, D. Application of phylogenetic networks in evolutionary studies. *Mol.*  
570            *Biol. Evol.* **23**, 254-267 (2006).
- 571    69. Patterson, N., *et al.* Ancient admixture in human history. *Genetics.* **192**, 1065-1093 (2012).
- 572    70. Librado, P. & Rozas, J. DnaSP v5: a software for comprehensive analysis of DNA  
573            polymorphism data. *Bioinformatics.* **25**, 1451-1452 (2009).
- 574    71. Bonfiglio, S., De Gaetano, A., Tesfaye, K., Grugni, V., Semino, O. & Ferretti, L. A novel  
575            USP9Y polymorphism allowing a rapid and unambiguous classification of *Bos taurus* Y  
576            chromosomes into haplogroups. *Anim. Genet.* **43**, 611-613 (2012).
- 577    72. Edwards, C. J., *et al.* Dual origins of dairy cattle farming--evidence from a comprehensive  
578            survey of European Y-chromosomal variation. *PLoS One.* **6**, e15922 (2011).
- 579    73. Günther, T. & Coop, G. Robust identification of local adaptation from allele frequencies.  
580            *Genetics.* **195**, 205-220 (2013).
- 581

582 **Acknowledgement**

583 This work was supported by National Natural Scientific Foundation of China (31561143010,  
584 31272418) and China Agricultural Research System (CARS-37). Xi Wang was supported by  
585 Shanxi Scientific and Technological Development Programs (20140311018-1, 20120311021-1).  
586 The authors thank Dr. Hideyuki Mannen (Kobe University, Japan), Dr. Albano Beja-Pereira  
587 (Universidade do Porto, Portugal) and Hartati Hartati (Indonesian Agency for Agricultural  
588 Research and Development, Ministry of Agriculture) for providing detailed information on their  
589 data sets.

590

591 **Author Contributions**

592 Y.Z., J.A.L. and M.G. conceived the experiments. Y.G., M.G., X.D., H.Z., Y.W., X.W.,  
593 M.O.F., J.L., S.Y., X.G., J.H., J.A.L. and Y.Z. contributed samples. Y.G., M.G., J.A.L. and Y.Z.  
594 analysed the data. Y.G., M.G., J.A.L. and Y.Z. prepared the original draft. J.H., J.A.L. and Y.Z.  
595 reviewed and edited the paper.

596

597 **Additional Information**

598 **Competing financial interests:** The authors declare no competing financial interests.  
599

## 600 **Figure legends**

601 **Figure 1. Geographical distribution of cattle populations.** Detailed information is showed in  
602 Table 1. Map was created using R 3.3.1 packages *rworldmap*, *maps* and *mapproj* ([https://cran.r-](https://cran.r-project.org/web/packages/)  
603 [project.org/web/packages/](https://cran.r-project.org/web/packages/)). Package *rworldmap* was used to generate outline and colorful dots  
604 while packages *maps* and *mapproj* were used to add texts.

605 **Figure 2. PCA plots describing the relationships among populations.** (a) Whole data set of all  
606 the 45 sampled populations. (b) A subset of data including only Asian cattle.

607 **Figure 3. Ancestries and population structuring of Chinese cattle revealed by (a)**  
608 **unsupervised Admixture analysis (K=2,3,4,5,17) and (b) supervised Admixture analysis**  
609 **(K=5).** For supervised admixture analysis, five European cattle breeds (SH, HOL, LMS, SIM)  
610 were set to represent taurine ancestry whereas GIR and SAHW represented indicine ancestry.  
611 BAL, GAY and YAK were three outgroup bovine species. The putative hybrid animals in Bali  
612 and Gayal detected by unsupervised admixture analysis were excluded from the pure ancestry.

613 **Figure 4. NeighborNet graph of 44 cattle populations.** An allele frequency-dependent distance  
614 metric (Reynolds) was used to construct the NeighborNet.

615 **Figure 5. Visualization of  $f_4$ -statistics.** (a)  $f_4$ -statistics of the form D (GIR, X; BAL, YAK)  
616 identified gene flow from Bali to other breeds. (b)  $f_4$ -statistics of the form D (GIR, X; GAU, YAK)  
617 identified gene flow from Gaur to other breeds. The whiskers represent the standard error.

618 **Figure 6. Correlation of autosomal, mtDNA and Y-chromosomal indicine components.**  
619 Uniparental markers were used to build the correlation graph which showed a north-to-south  
620 taurine-indicine gradient that resembles closely the autosomal cline.

621 **Figure 7. Whole genome scan for adaptive divergence and association analyses in 20 Chinese**  
622 **cattle breeds.** (a) Manhattan plot of the XtX statistics. (b) Manhattan plot of the BFmc  
623 (association with environmental PC1). (c) Manhattan plot based on the BFmc (association with  
624 morphological PC1).  
625

| Population          | Abbr. | Geographical Region    | Type                 | N   | Ho    | Source <sup>1</sup> |
|---------------------|-------|------------------------|----------------------|-----|-------|---------------------|
| Yanbian             | YB    | Northern China         | taurine              | 26  | 0.291 | 1                   |
| Mongolian_XilinGol  | MG    | Northern China         | taurine              | 31  | 0.319 | 1                   |
| Mongolian_HulunBuir | NM    | Northern China         | taurine              | 24  | 0.317 | 1                   |
| Kazakh              | KA    | Northwestern China     | taurine              | 21  | 0.327 | 1                   |
| Linzhi              | LZ    | Tibet, China           | taurine              | 19  | 0.285 | 1                   |
| Lhasa               | LS    | Tibet, China           | taurine              | 14  | 0.305 | 1                   |
| Qinchuan            | QC    | Central China          | mixed                | 32  | 0.297 | 1,2                 |
| Jinnan              | JN    | Central China          | mixed                | 14  | 0.299 | 1                   |
| Nanyang             | NY    | Central China          | mixed                | 23  | 0.252 | 1                   |
| Luxi                | LX    | Central China          | mixed                | 16  | 0.258 | 1,2                 |
| Wannan              | WN    | Southeastern China     | zebu                 | 31  | 0.199 | 1                   |
| Wenling             | WL    | Southeastern China     | zebu                 | 31  | 0.177 | 1                   |
| Hainan              | HN    | Southeastern China     | zebu                 | 8   | 0.145 | 1,2                 |
| Liping              | LP    | Southwestern China     | zebu                 | 5   | 0.179 | 1                   |
| Enshi               | ES    | Southwestern China     | mixed                | 31  | 0.237 | 1                   |
| Guanling            | GL    | Southwestern China     | mixed                | 4   | 0.232 | 1                   |
| Honghe              | HH    | Southwestern China     | mixed                | 12  | 0.248 | 1                   |
| Dengchuan           | DC    | Southwestern China     | mixed                | 31  | 0.243 | 1                   |
| Banna               | BN    | Far southwestern China | zebu                 | 14  | 0.186 | 1                   |
| Dehong              | DH    | Far southwestern China | zebu                 | 16  | 0.161 | 1                   |
| Bangladesh Zebu     | BD    | Bangladesh             | zebu                 | 16  | 0.169 | 1                   |
| Gayal               | GAY   | Bangladesh             | <i>Bos frontalis</i> | 21  | 0.059 | 1                   |
| Yak                 | YAK   | Tibet, China           | <i>Bos grunniens</i> | 12  | 0.029 | 1                   |
| Simmental           | SIM   | Germany                | taurine              | 20  | 0.297 | 1                   |
| Hanwoo              | HAN   | Korea                  | taurine              | 8   | 0.288 | 2                   |
| Mongolian           | MGL   | Mongolia               | taurine              | 5   | 0.301 | 2                   |
| Wagyu               | WAG   | Japan                  | taurine              | 12  | 0.248 | 2                   |
| Aceh                | ACE   | Indonesia              | zebu                 | 12  | 0.149 | 2                   |
| Pesisir             | PES   | Indonesia              | zebu                 | 6   | 0.142 | 2                   |
| Brebes              | BRE   | Indonesia              | zebu                 | 9   | 0.158 | 2                   |
| Madura              | MAD   | Indonesia              | zebu                 | 7   | 0.150 | 2                   |
| Sahiwal             | SAHW  | Pakistan               | zebu                 | 17  | 0.159 | 2                   |
| Gir                 | GIR   | India                  | zebu                 | 20  | 0.157 | 2                   |
| Bali cattle         | BAL   | Indonesia              | <i>Bos javanicus</i> | 20  | 0.026 | 2                   |
| Gaur                | GAUR  | India                  | <i>Bos gaurus</i>    | 10  | 0.000 | 7                   |
| Shorthorn           | SH    | England                | taurine              | 20  | 0.257 | 2                   |
| Holstein            | HOL   | Netherlands            | taurine              | 20  | 0.314 | 3                   |
| Brown Swiss         | BSW   | Switzerland            | taurine              | 20  | 0.281 | 6                   |
| Limousin            | LMS   | France                 | taurine              | 20  | 0.309 | 6                   |
| Central Thailand    | THC   | Thailand               | zebu                 | 5   | 0.165 | 4                   |
| Northeast Thailand  | THNE  | Thailand               | zebu                 | 8   | 0.157 | 4                   |
| North Thailand      | THR   | Thailand               | zebu                 | 10  | 0.166 | 4                   |
| South Thailand      | THS   | Thailand               | zebu                 | 5   | 0.142 | 4                   |
| Kalmyk              | KAL   | Kalmyk, Russian        | taurine              | 20  | 0.319 | 5                   |
| Yakut               | YKT   | Siberian, Russian      | taurine              | 20  | 0.256 | 5                   |
| Total               |       |                        |                      | 756 |       |                     |

626 **Table 1. Sampling information of different cattle populations and their observed**  
627 **heterozygosity (Ho).** Source of data. 1) this study; 2) Decker *et al.* (2014); 3) Gautier *et al.* (2010);  
628 4) Wangkunmhang *et al.* (2015); 5) Decker *et al.* (2016); 6) Matukumalli *et al.* (2009); 7) Decker  
629 *et al.* (2009).

630

631

| Position              | XtX                   | Bfmc               |          |                      |                      | Closest RefSeq gene                                          |
|-----------------------|-----------------------|--------------------|----------|----------------------|----------------------|--------------------------------------------------------------|
|                       |                       | env. PC1           | env. PC2 | env. PC3             | morpho. PC1          |                                                              |
| BTA02 : 61.5 - 62.5   | -                     | 61.89 (25.50 ; 2)  | -        | -                    | -                    | <i>LCT</i> (61.87-61.92)                                     |
| BTA03 : 33.0 - 34.5   | -                     | 33.98 (15.14 ; 2)  | -        | -                    | -                    | <i>AMPD2</i> (33.93-3394)                                    |
| BTA03 : 46.5 - 48.0   | -                     | 47.34 (24.04 ; 2)  | -        | -                    | -                    | <i>PAPSS1</i> (47.27-47.67)                                  |
| BTA03 : 90.0 - 91.5   | -                     | 90.55 (22.17 ; 3)  | -        | -                    | -                    | <i>PLPP3</i> (90.19-90.27)                                   |
| BTA04 : 30.0 - 31.0   | -                     | 30.04 (22.70 ; 2)  | -        | -                    | -                    | <i>SP4</i> (30.32-30.41)                                     |
| BTA05 : 17.5 - 19.0   | -                     | 18.02 (35.87 ; 2)  | -        | -                    | -                    | <i>TMTC3</i> (17.99-18.05)                                   |
| BTA05 : 69.5 - 71.0   | 70.34<br>(64.00 ; 2)  | 70.31 (17.19 ; 1)  | -        | 70.34<br>(18.64 ; 1) | 70.34<br>(26.72 ; 3) | <i>RFX4</i> (70.22-70.39)                                    |
| BTA06 : 17.5 - 19.0   | 18.29<br>(44.13 ; 2)  | -                  | -        | -                    | -                    | <i>LEF1</i> (18.33-18.45)                                    |
| BTA06 : 39.5 - 41.5   | 39.84<br>(40.33 ; 3)  | 41.25 (17.72 ; 1)  | -        | 39.84<br>(25.61 ; 1) | 40.33<br>(20.22 ; 1) | <i>SLIT2</i> (41.24-41.64)                                   |
| BTA06 : 46.0 - 47.5   | -                     | 46.79 (26.40 ; 2)  | -        | -                    | -                    | <i>SELL1L3</i> (46.79-46.88)                                 |
| BTA06 : 73.5 - 75.0   | -                     | 74.35 (22.14 ; 2)  | -        | -                    | -                    | <i>IGFBP7</i> (74.07-74.15)                                  |
| BTA06 : 105.0 - 106.5 | -                     | 105.63 (16.52 ; 2) | -        | -                    | -                    | <i>STK32B</i> (105.52-105.89)                                |
| BTA08 : 59.5 - 60.5   | -                     | -                  | -        | -                    | 60.00<br>(16.98 ; 2) | <i>UNC13B</i> (59.79-60.01)                                  |
| BTA08 : 81.0 - 82.0   | 81.57<br>(34.93 ; 1)  | 81.57 (23.66 ; 2)  | -        | -                    | -                    | <i>GAS1</i> (81.50-81.51)                                    |
| BTA08 : 111.5 - 113.0 | -                     | 112.13 (22.78 ; 2) | -        | -                    | -                    | <i>PHF19</i> (112.14-112.16)                                 |
| BTA10 : 31.0 - 32.5   | 31.66<br>(33.71 ; 2)  | -                  | -        | -                    | -                    | <i>COPPS5</i> (31.70-31.70)                                  |
| BTA11 : 9.00 - 10.5   | -                     | 9.91 (20.55 ; 2)   | -        | -                    | -                    | <i>SEMA4F</i> (9.94-9.97)                                    |
| BTA11 : 22.5 - 24.5   | -                     | 23.09 (45.17 ; 3)  | -        | 23.80<br>(16.19 ; 1) | -                    | NA                                                           |
| BTA12 : 34.0 - 35.5   | -                     | 34.68 (20.72 ; 2)  | -        | -                    | -                    | <i>TNFRSF19</i> (34.67-34.76)                                |
| BTA12 : 78.0 - 79.0   | -                     | 78.61 (16.86 ; 2)  | -        | -                    | -                    | <i>RAP2A</i> (78.51-78.55)                                   |
| BTA13 : 45.5 - 48.5   | 47.02<br>(44.22 ; 10) | 46.08 (28.49 ; 1)  | -        | 48.09<br>(45.17 ; 1) | -                    | <i>DIP2C</i> (46.89-47.18) ;<br><i>PROKR2</i> (47.91-4792)   |
| BTA13 : 50.5 - 52.0   | 51.42<br>(36.09 ; 2)  | -                  | -        | -                    | 50.7<br>(16.42 ; 2)  | <i>ADRA1D</i> (51.37-51.39) ;<br><i>UBE2E3</i> (50.38-50.65) |
| BTA13 : 53.0 - 54.5   | 53.81<br>(39.73 ; 2)  | -                  | -        | -                    | -                    | <i>SIRPB1</i> (53.90-53.94)                                  |
| BTA15 : 52.0 - 53.5   | -                     | 52.80 (25.87 ; 2)  | -        | -                    | -                    | <i>CLPB</i> (52.66-52.80)                                    |
| BTA20 : 67.5 - 69.0   | -                     | 68.40 (17.23 ; 2)  | -        | -                    | -                    | <i>ADAMTS16</i> (67.94-68.14)                                |
| BTA21 : 27.5 - 29.0   | -                     | 28.20 (27.59 ; 2)  | -        | -                    | -                    | <i>KLF13</i> (28.22-28.22)                                   |
| BTA24 : 39.5 - 40.5   | -                     | 40.49 (20.22 ; 2)  | -        | -                    | -                    | <i>LAMA1</i> (40.35-40.51)                                   |

632 **Table 2. Regions consisting of overlapping windows each containing at least one SNP with**  
633 **XtX score >32.2 or at least one Bfmc score >15 identified by BayPass whole genome scan.**  
634 **For each XtX or Bfmc test, the table gives the peak position in Mb as well as the peak**  
635 **statistics value and the number of SNPs in parentheses with a test value above the**  
636 **corresponding threshold. Dash (-) indicates non-significant results.**

637



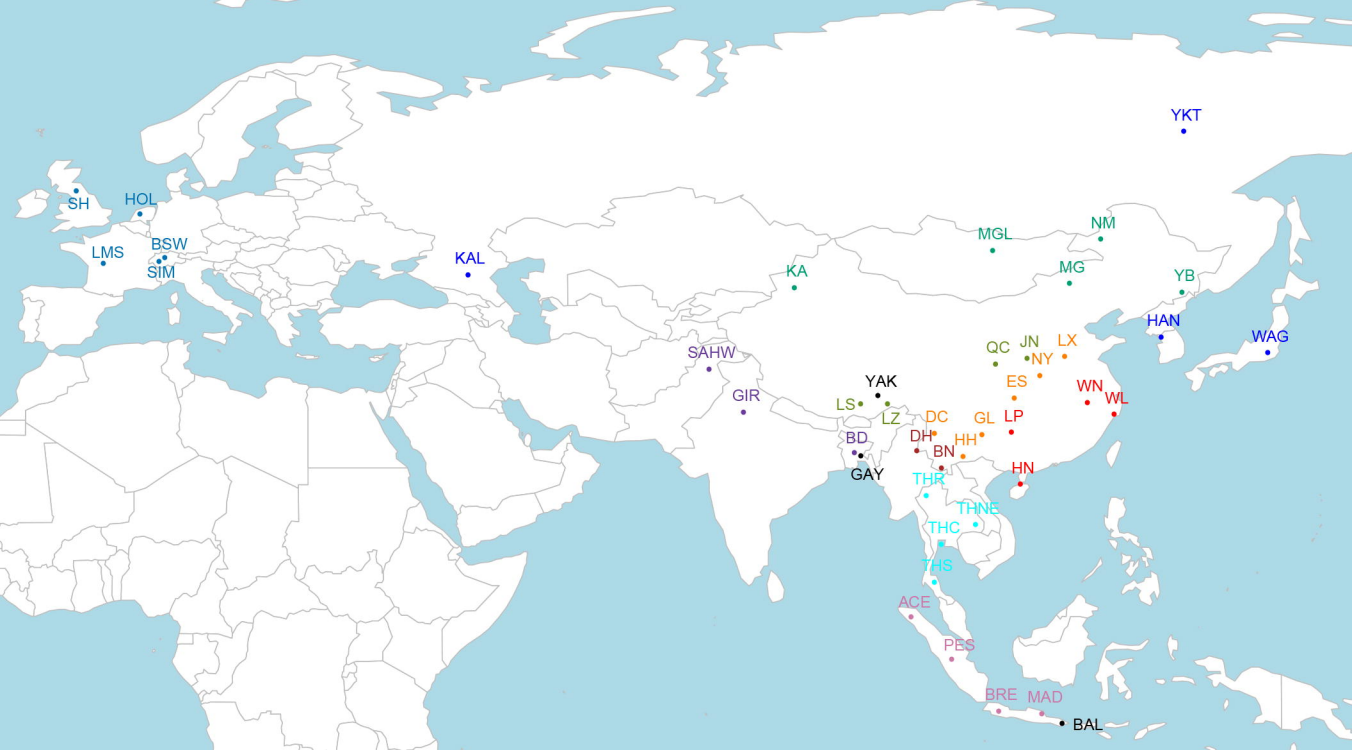

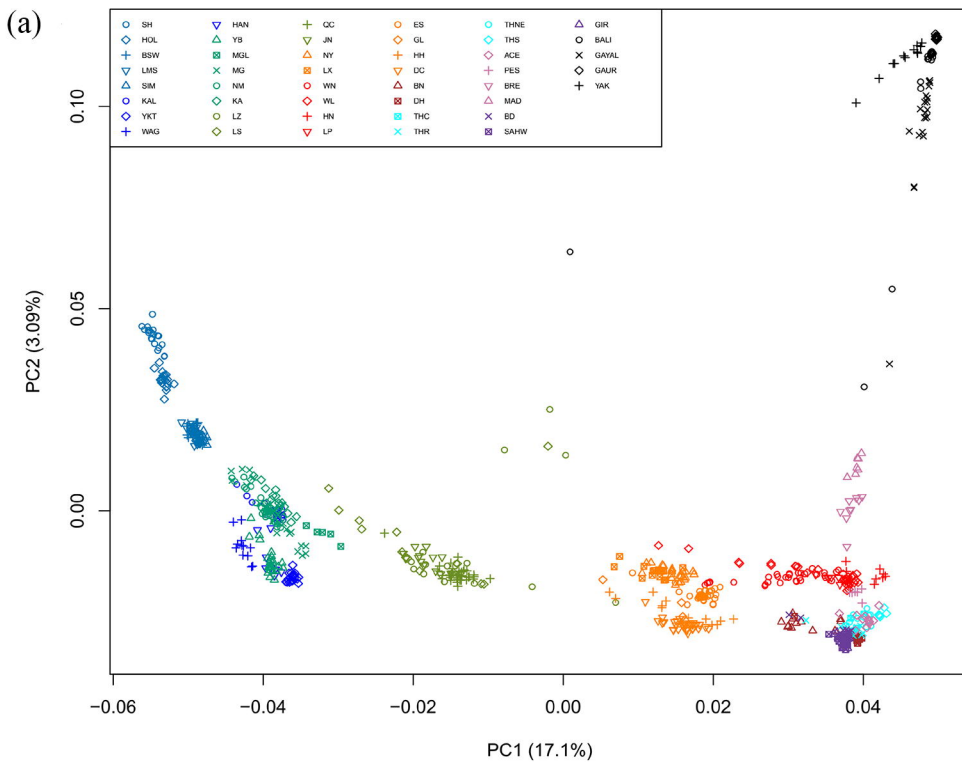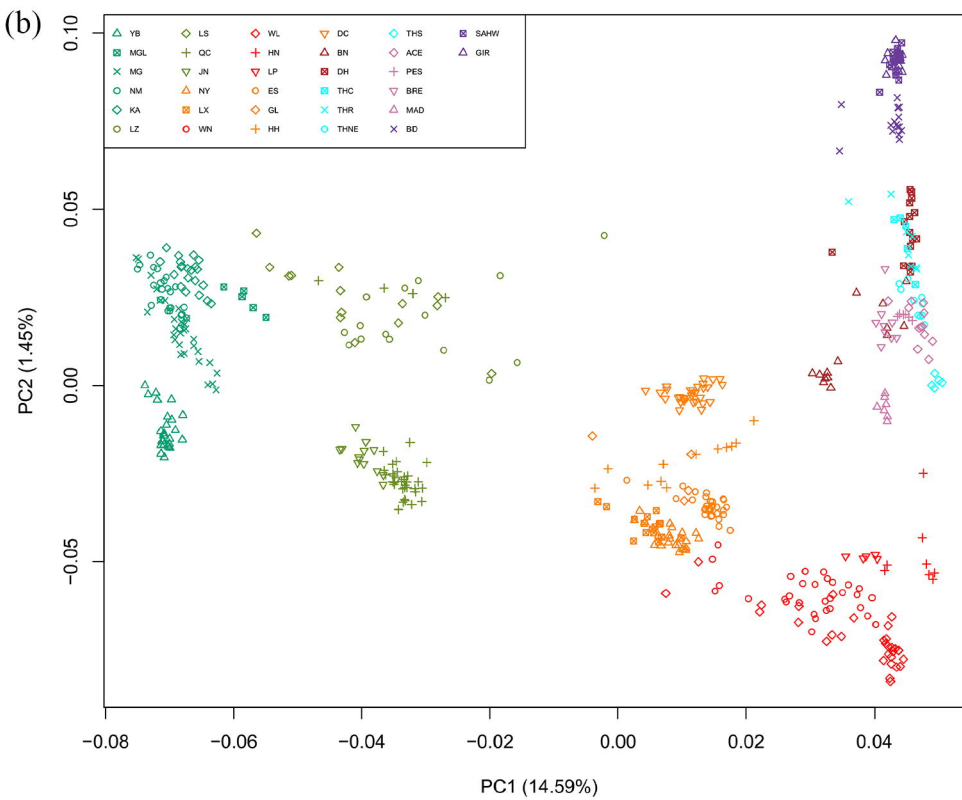

(a)

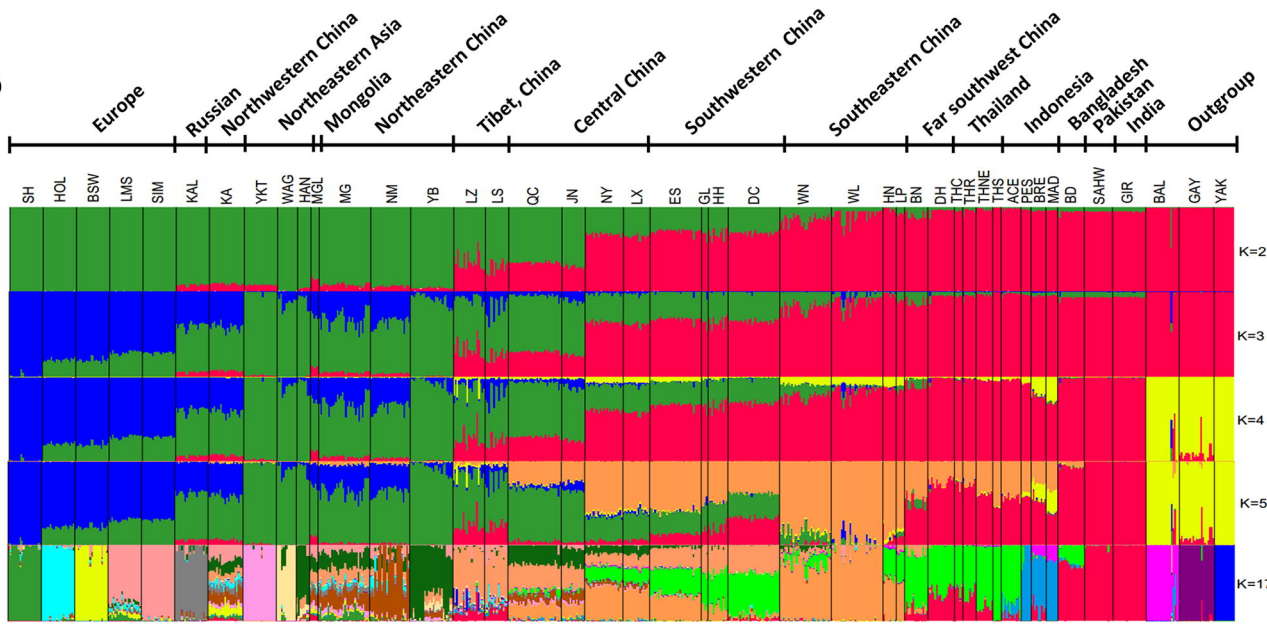

(b)

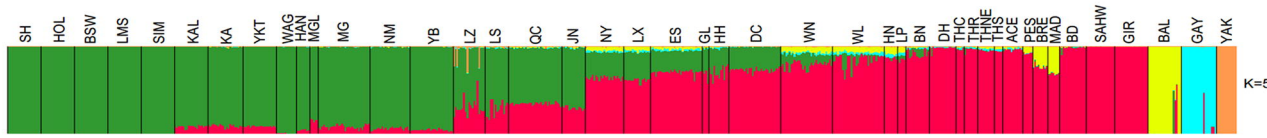

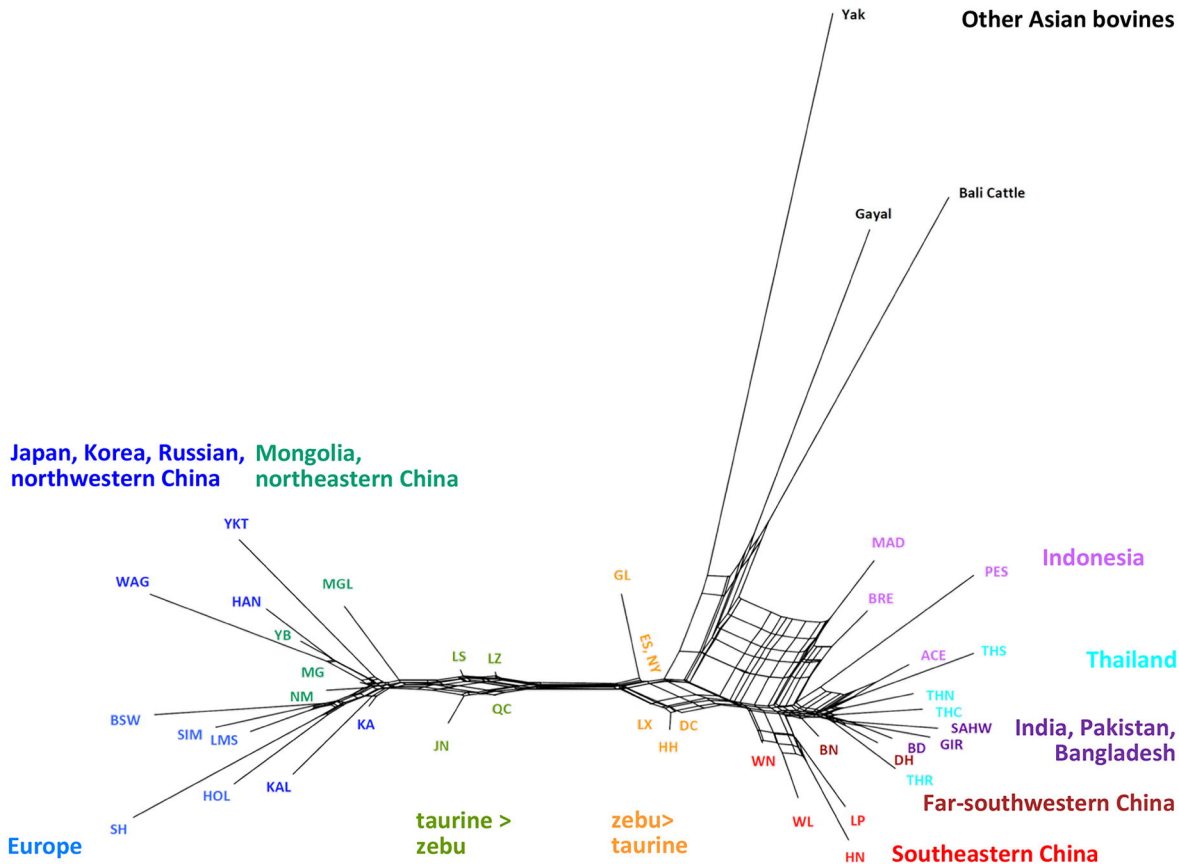

(a)

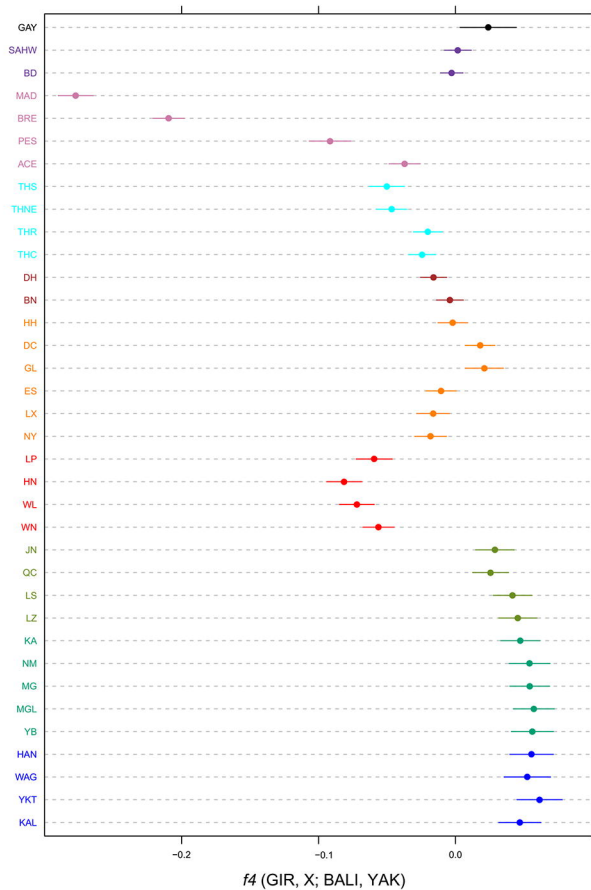

(b)

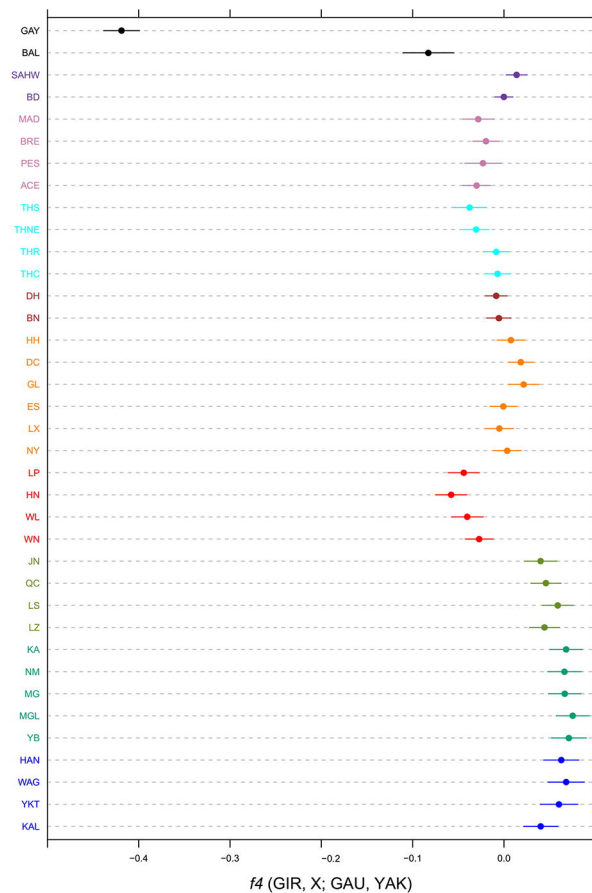

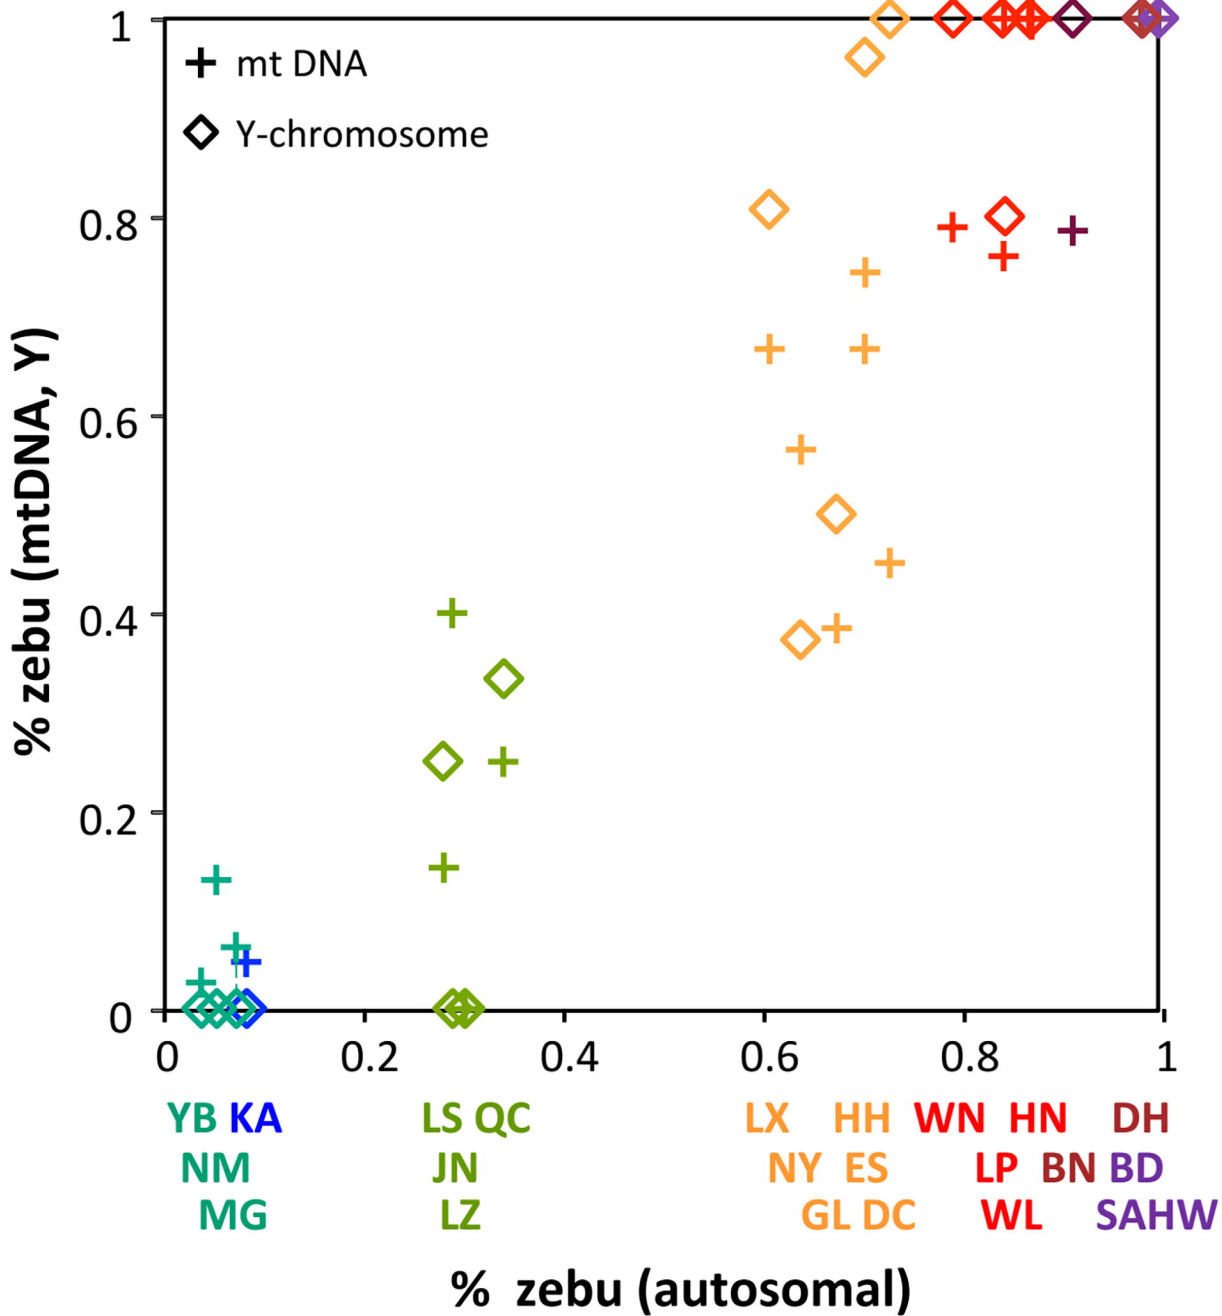

XIX (differentiation statistics)

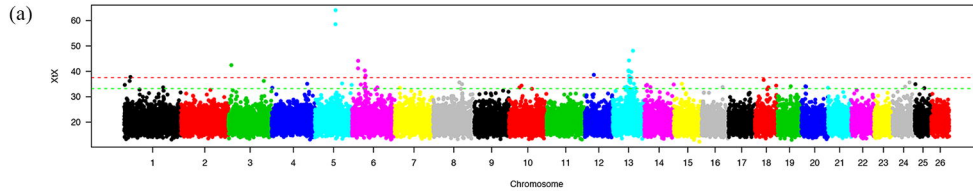

Association with environmental PC1 (BF<sub>mc</sub>)

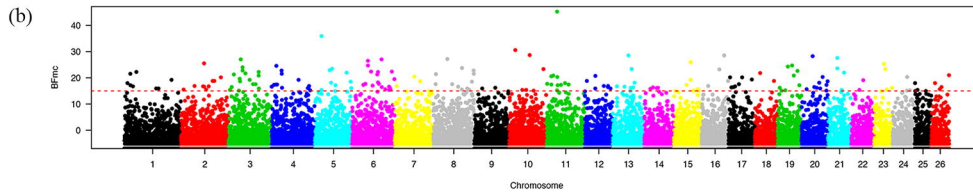

Association with morphological PC1 (BF<sub>mc</sub>)

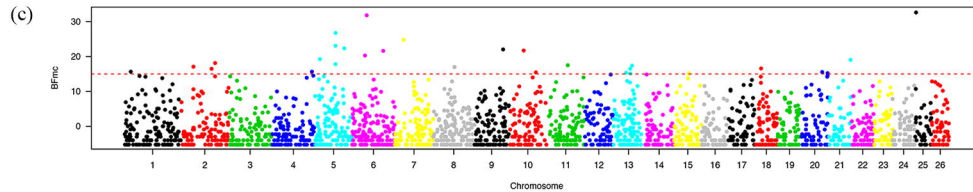

Source: https://www.biorxiv.org/content/10.1101/170449v1.full.pdf
